# Supplementary material for: Single-molecule magnet Fe9 supramolecular dimers: a theoretical approach to intramolecular and intermolecular exchange interactions
Source: Royal Society of Chemistry journal article supplement (doi:10.1039/b905950d), 2009-01-01
Supplement: b905950d.pdf [file b905950d.pdf]

## Electronic Supplementary Information

**Table S1.** Calculated J values, considering a model with twenty-one J values, for one of the two molecules (a' and a'', see Fig. 2) of the Fe<sub>9</sub> dimer using numerical calculations (double- $\zeta$  basis set only triple- $\zeta$  for iron atoms) with Siesta code<sup>6</sup> and PBE functional<sup>7</sup> and with NWChem code<sup>8</sup> using an all electron triple- $\zeta$  basis set<sup>9</sup> and the B3LYP functional.<sup>10</sup> The label of the J value indicates the two interacting metal centers (see Fig. 1).

| J (cm <sup>-1</sup> ) | bridging ligand                                      | a' Siesta | a'' Siesta | a'' NWChem |
|-----------------------|------------------------------------------------------|-----------|------------|------------|
| J <sub>23</sub>       | 2 $\mu_3$ -OH, $\mu_2$ -O <sub>2</sub> CPh           | -1.3      | -1.3       | -1.4       |
| J <sub>12</sub>       | $\mu_3$ -O, $\mu_3$ -OH, $\mu_2$ -O <sub>2</sub> CPh | -15.2     | -15.3      | -13.3      |
| J <sub>34</sub>       | $\mu_3$ -O, $\mu_3$ -OH, $\mu_2$ -O <sub>2</sub> CPh | -16.5     | -16.5      | -14.8      |
| J <sub>13</sub>       | $\mu_3$ -OH                                          | -21.0     | -21.0      | -24.5      |
| J <sub>24</sub>       | $\mu_3$ -OH                                          | -20.0     | -20.0      | -22.4      |
| J <sub>28</sub>       | $\mu_3$ -O, $\mu_2$ -O <sub>2</sub> CPh              | -50.1     | -50.0      | -67.4      |
| J <sub>36</sub>       | $\mu_3$ -O, $\mu_2$ -O <sub>2</sub> CPh              | -58.8     | -59.5      | -77.3      |
| J <sub>18</sub>       | $\mu_3$ -O                                           | -42.7     | -42.7      | -63.5      |
| J <sub>46</sub>       | $\mu_3$ -O                                           | -40.2     | -40.4      | -57.4      |
| J <sub>16</sub>       | $\mu_3$ -OH                                          | -18.2     | -18.1      | -22.8      |
| J <sub>48</sub>       | $\mu_3$ -OH                                          | -14.2     | -14.1      | -17.7      |
| J <sub>67</sub>       | $\mu_3$ -O, $\mu_3$ -OH                              | -4.7      | -4.7       | -4.3       |
| J <sub>78</sub>       | $\mu_3$ -O, $\mu_3$ -OH                              | -10.1     | -10.1      | -9.6       |
| J <sub>56</sub>       | $\mu_3$ -O, $\mu_2$ -O <sub>2</sub> CPh              | -49.5     | -49.3      | -67.2      |
| J <sub>89</sub>       | $\mu_3$ -O, $\mu_2$ -O <sub>2</sub> CPh              | -48.3     | -48.1      | -63.0      |
| J <sub>17</sub>       | $\mu_3$ -OH                                          | -13.3     | -13.2      | -17.4      |
| J <sub>47</sub>       | $\mu_3$ -OH                                          | -10.7     | -10.7      | -12.8      |
| J <sub>45</sub>       | $\mu_3$ -O                                           | -29.4     | -28.7      | -34.7      |
| J <sub>19</sub>       | $\mu_3$ -O                                           | -27.0     | -27.0      | -31.7      |
| J <sub>57</sub>       | $\mu_3$ -O, $\mu_2$ -O <sub>2</sub> CPh              | -47.7     | -47.7      | -64.6      |
| J <sub>79</sub>       | $\mu_3$ -O, $\mu_2$ -O <sub>2</sub> CPh              | -49.8     | -49.9      | -67.2      |
